# Supplementary material for: A theoretical study on hydrated sodium ion–phenylalanine clusters Na+(Phe)(H2O)n (n = 0–6; Phe = phenylalanine)
Source: Royal Society of Chemistry journal article supplement (doi:10.1039/d3cp03144f), 2023-01-01
Supplement: d3cp03144f1.pdf [file d3cp03144f1.pdf]

*Electronic Supplementary Information for*

# **A theoretical study on hydrated sodium ion-phenylalanine clusters $\text{Na}^+(\text{Phe})(\text{H}_2\text{O})_n$ ( $n = 0-6$ ; Phe = phenylalanine)**

Haiyang Gao,<sup>a</sup> Mo Xiong,<sup>a</sup> Chuncai Kong,<sup>a</sup> Zhimao Yang,<sup>a</sup> Tao Yang<sup>a,b,\*</sup>

<sup>a</sup>MOE Key Laboratory for Non-Equilibrium Synthesis and Modulation of Condensed Matter, School of Physics, Xi'an Jiaotong University, Xi'an 710049, Shaanxi, China

<sup>b</sup>Xi'an Jiaotong University Suzhou Academy, Suzhou, China

Email: [taoyang1@xjtu.edu.cn](mailto:taoyang1@xjtu.edu.cn)

## **Contents**

|                                                                                                 |    |
|-------------------------------------------------------------------------------------------------|----|
| The determination of electronic ground state.....                                               | 1  |
| Test calculation with different functionals.....                                                | 2  |
| The mayer bond order of $\text{Na}^+(\text{Phe})(\text{H}_2\text{O})_n$ .....                   | 3  |
| Atoms in molecules analysis.....                                                                | 4  |
| Three lowest-energy structures of $\text{Na}^+(\text{Phe})(\text{H}_2\text{O})_2$ .....         | 5  |
| Another geometric optimization of $\text{Na}^+(\text{Phe})(\text{H}_2\text{O})_5$ .....         | 6  |
| Molecular orbitals.....                                                                         | 7  |
| EDA-NOCV results.....                                                                           | 8  |
| AIMD simulation of $\text{Na}^+(\text{Phe})(\text{H}_2\text{O})_6$ at 300K.....                 | 10 |
| Simulated infrared spectra for $\text{Na}^+(\text{Phe})(\text{H}_2\text{O})_n$ ( $n=0-6$ )..... | 11 |
| Cartesian coordinates.....                                                                      | 12 |

**Table S1.** The singlet-triplet splitting energy  $\Delta E_{S-T}$  for  $\text{Na}^+(\text{Phe})(\text{H}_2\text{O})_n$  ( $n=0-6$ ) given in eV.

| $\text{Na}^+(\text{Phe})(\text{H}_2\text{O})_n$ | Singlet(eV) | Triplet(eV) | $\Delta E_{S-T}$ (eV) |
|-------------------------------------------------|-------------|-------------|-----------------------|
| n=0                                             | -19516.82   | -19513.16   | 3.66                  |
| n=1                                             | -21598.37   | -21594.67   | 3.70                  |
| n=2                                             | -23679.77   | -23676.08   | 3.69                  |
| n=3                                             | -25761.27   | -25757.59   | 3.68                  |
| n=4                                             | -27842.67   | -27839.03   | 3.64                  |
| n=5                                             | -29924.10   | -29920.48   | 3.62                  |
| n=6                                             | -32005.50   | -32001.80   | 3.70                  |

To determine the spin state of the  $\text{Na}^+(\text{Phe})(\text{H}_2\text{O})_n$  ( $n=0-6$ ), the singlet and triplet states were calculated. As shown in Table S1, the single and triplet bond energies of these are all positive. The singlet state is more stable than the triplet state by more than 3.62 eV at the BP86-D3(BJ)/TZVPP level of theory. Therefore, the electron singlet ground state of the  $\text{Na}^+(\text{Phe})(\text{H}_2\text{O})_n$  ( $n=0-6$ ) system is confirmed.

**Table S2.** Test calculations on binding energy of one water molecule from Na<sup>+</sup>(Phe) and Na<sup>+</sup>(Phe)(H<sub>2</sub>O)<sub>1</sub> to Na<sup>+</sup>(Phe)(H<sub>2</sub>O)<sub>1</sub> and Na<sup>+</sup>(Phe)(H<sub>2</sub>O)<sub>2</sub>, respectively, by using different functionals with def2-TZVPP basis set. The AE and RMSD are average error and root mean square deviation, respectively.

| Functional          | Na <sup>+</sup> (Phe)(H <sub>2</sub> O) <sub>1</sub> |                                      | Na <sup>+</sup> (Phe)(H <sub>2</sub> O) <sub>2</sub> |                                      | AE/RMSD   |
|---------------------|------------------------------------------------------|--------------------------------------|------------------------------------------------------|--------------------------------------|-----------|
|                     | $\Delta H$ (kcal mol <sup>-1</sup> )                 | $\Delta G$ (kcal mol <sup>-1</sup> ) | $\Delta H$ (kcal mol <sup>-1</sup> )                 | $\Delta G$ (kcal mol <sup>-1</sup> ) |           |
| BP86-D3(BJ)         | 16.45(2.85)                                          | 8.78(0.88)                           | 12.98(0.68)                                          | 5.91(0.61)                           | 1.26/1.56 |
| B3LYP-D3(BJ)        | 18.04(4.44)                                          | 10.42(2.52)                          | 14.42(2.12)                                          | 7.14(1.84)                           | 2.73/2.91 |
| M06-2X-D3(zero)     | 16.31(2.71)                                          | 8.92(1.02)                           | 13.18(0.88)                                          | 4.82(0.48)                           | 1.28/1.53 |
| PBE-D3(BJ)          | 17.27(3.57)                                          | 9.75(1.85)                           | 14.22(1.92)                                          | 6.74(1.44)                           | 2.20/2.34 |
| PBE0-D3(BJ)         | 16.99(3.39)                                          | 10.26(2.36)                          | 14.04(1.74)                                          | 5.88(0.58)                           | 2.02/2.26 |
| $\omega$ B97XD      | 15.71(2.11)                                          | 9.13(1.23)                           | 11.84(0.46)                                          | 3.15(2.15)                           | 1.49/1.64 |
| Experimental values | 13.6                                                 | 7.9                                  | 12.3                                                 | 5.3                                  | /         |

**Table S3.** The Mayer bond order of Na–N<sub>Phe</sub>, Na–O<sub>Phe</sub>, and Na–O<sub>H<sub>2</sub>O</sub> bond in Na<sup>+</sup>(Phe)(H<sub>2</sub>O)<sub>n</sub>.

| Na <sup>+</sup> (Phe)(H <sub>2</sub> O) <sub>n</sub> | Bond                                    | Mayer bond order |
|------------------------------------------------------|-----------------------------------------|------------------|
| n=0                                                  | Na–N(Phe, d <sub>1</sub> )              | 0.161            |
|                                                      | Na–O(Phe, d <sub>2</sub> )              | 0.149            |
| n=1                                                  | Na–N(Phe, d <sub>1</sub> )              | 0.147            |
|                                                      | Na–O(Phe, d <sub>2</sub> )              | 0.142            |
|                                                      | Na–O(H <sub>2</sub> O, d <sub>3</sub> ) | 0.107            |
| n=2                                                  | Na–N(Phe, d <sub>1</sub> )              | 0.123            |
|                                                      | Na–O(Phe, d <sub>2</sub> )              | 0.122            |
|                                                      | Na–O(H <sub>2</sub> O, d <sub>3</sub> ) | 0.097            |
|                                                      | Na–O(H <sub>2</sub> O, d <sub>4</sub> ) | 0.102            |
| n=3                                                  | Na–N(Phe, d <sub>1</sub> )              | 0.149            |
|                                                      | Na–O(Phe, d <sub>2</sub> )              | 0.101            |
|                                                      | Na–O(H <sub>2</sub> O, d <sub>3</sub> ) | 0.119            |
| n=4                                                  | Na–N(Phe, d <sub>1</sub> )              | 0.119            |
|                                                      | Na–O(Phe, d <sub>2</sub> )              | 0.093            |
|                                                      | Na–O(H <sub>2</sub> O, d <sub>3</sub> ) | 0.114            |
|                                                      | Na–O(H <sub>2</sub> O, d <sub>4</sub> ) | 0.116            |
| n=5                                                  | Na–O(Phe, d <sub>1</sub> )              | 0.069            |
|                                                      | Na–O(H <sub>2</sub> O, d <sub>2</sub> ) | 0.126            |
|                                                      | Na–O(H <sub>2</sub> O, d <sub>3</sub> ) | 0.122            |
|                                                      | Na–O(H <sub>2</sub> O, d <sub>4</sub> ) | 0.165            |
| n=6                                                  | Na–O(H <sub>2</sub> O, d <sub>1</sub> ) | 0.122            |
|                                                      | Na–O(Phe, d <sub>2</sub> )              | 0.088            |
|                                                      | Na–O(H <sub>2</sub> O, d <sub>3</sub> ) | 0.120            |

**Table S4.** Electron density ( $\rho_r$ ), Laplacian electron density [ $\nabla^2\rho(r)$ ], total energy density ( $H_r$ ), ratio of the potential energy density ( $V_r$ ) to kinetic energy density ( $G_r$ ), and ratio of  $G_r$  to  $\rho_r$  at the BCPs of the Na–O<sub>H<sub>2</sub>O</sub>, Na–O<sub>Phe</sub>, and Na–N<sub>Phe</sub> bonds by atoms in molecules (AIM) analysis

|     | BCP                                     | $\rho_r$ | $\nabla^2\rho(r)$ | $H_r$  | $ V_r /G_r$ | $G_r/\rho_r$ |
|-----|-----------------------------------------|----------|-------------------|--------|-------------|--------------|
| n=0 | Na–N(Phe, d <sub>1</sub> )              | 0.018    | 0.091             | 0.0041 | 0.78        | 1.05         |
|     | Na–O(Phe, d <sub>2</sub> )              | 0.021    | 0.13              | 0.0064 | 0.76        | 1.29         |
| n=1 | Na–N(Phe, d <sub>1</sub> )              | 0.018    | 0.094             | 0.0041 | 0.79        | 1.05         |
|     | Na–O(Phe, d <sub>2</sub> )              | 0.021    | 0.13              | 0.0063 | 0.76        | 1.29         |
|     | Na–O(H <sub>2</sub> O, d <sub>3</sub> ) | 0.024    | 0.16              | 0.0074 | 0.77        | 1.39         |
| n=2 | Na–N(Phe, d <sub>1</sub> )              | 0.018    | 0.092             | 0.0041 | 0.78        | 1.06         |
|     | Na–O(Phe, d <sub>2</sub> )              | 0.019    | 0.12              | 0.0061 | 0.75        | 1.28         |
|     | Na–O(H <sub>2</sub> O, d <sub>3</sub> ) | 0.019    | 0.13              | 0.0066 | 0.74        | 1.33         |
|     | Na–O(H <sub>2</sub> O, d <sub>4</sub> ) | 0.023    | 0.15              | 0.0073 | 0.77        | 1.37         |
| n=3 | Na–N(Phe, d <sub>1</sub> )              | 0.016    | 0.078             | 0.0036 | 0.77        | 1.01         |
|     | Na–O(Phe, d <sub>2</sub> )              | 0.017    | 0.11              | 0.0056 | 0.74        | 1.25         |
|     | Na–O(H <sub>2</sub> O, d <sub>3</sub> ) | 0.023    | 0.15              | 0.0072 | 0.77        | 1.37         |
| n=4 | Na–N(Phe, d <sub>1</sub> )              | 0.016    | 0.083             | 0.0038 | 0.78        | 1.03         |
|     | Na–O(Phe, d <sub>2</sub> )              | 0.016    | 0.098             | 0.0052 | 0.73        | 1.23         |
|     | Na–O(H <sub>2</sub> O, d <sub>3</sub> ) | 0.021    | 0.14              | 0.0069 | 0.75        | 1.35         |
|     | Na–O(H <sub>2</sub> O, d <sub>4</sub> ) | 0.021    | 0.14              | 0.0070 | 0.76        | 1.35         |
| n=5 | Na–O(Phe, d <sub>1</sub> )              | 0.012    | 0.077             | 0.0046 | 0.69        | 1.23         |
|     | Na–O(H <sub>2</sub> O, d <sub>2</sub> ) | 0.019    | 0.12              | 0.0061 | 0.75        | 1.28         |
|     | Na–O(H <sub>2</sub> O, d <sub>3</sub> ) | 0.020    | 0.13              | 0.0067 | 0.75        | 1.33         |
|     | Na–O(H <sub>2</sub> O, d <sub>4</sub> ) | 0.025    | 0.16              | 0.0068 | 0.79        | 1.33         |
| n=6 | Na–O(H <sub>2</sub> O, d <sub>1</sub> ) | 0.024    | 0.16              | 0.0075 | 0.78        | 1.39         |
|     | Na–O(Phe, d <sub>2</sub> )              | 0.022    | 0.16              | 0.0078 | 0.75        | 1.43         |
|     | Na–O(H <sub>2</sub> O, d <sub>3</sub> ) | 0.023    | 0.15              | 0.0073 | 0.77        | 1.38         |

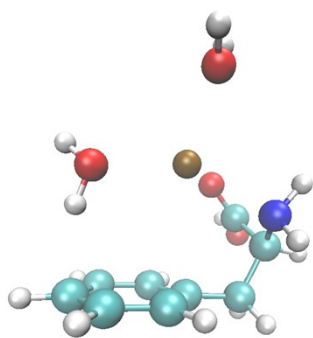

① N/O/O/O/Ring

Pentadentate

$\Delta(E+ZPE)$  0.00 kcal mol<sup>-1</sup>

$\Delta H$  0.00 kcal mol<sup>-1</sup>

$\Delta G$  0.00 kcal mol<sup>-1</sup>

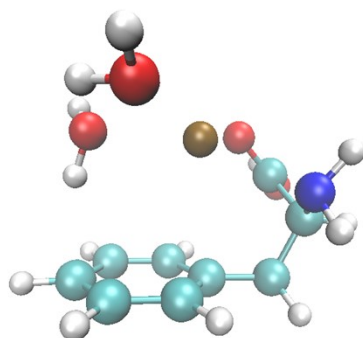

② N/O/O/O/Ring

Pentadentate

0.17 kcal mol<sup>-1</sup>

-0.12 kcal mol<sup>-1</sup>

1.16 kcal mol<sup>-1</sup>

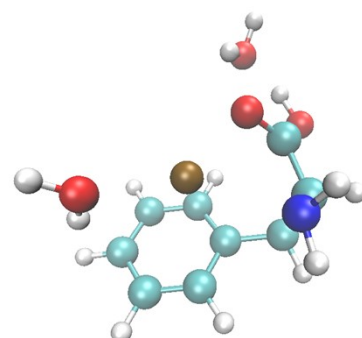

③ N/O/O/Ring

Quadridentate

0.18 kcal mol<sup>-1</sup>

-0.17 kcal mol<sup>-1</sup>

1.27 kcal mol<sup>-1</sup>

**Fig. S1** The three lowest structures of energy of optimized geometries of the Na<sup>+</sup>(Phe)(H<sub>2</sub>O)<sub>2</sub>, which have very small differences in energy. We take the energy of structure one as the zero point.

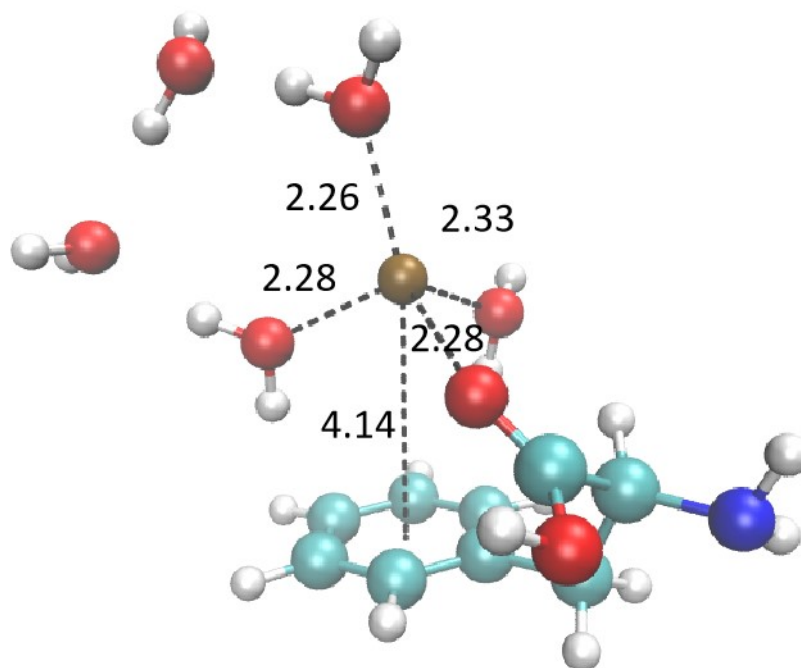

**Fig. S2** Another geometric optimization of Na<sup>+</sup>(Phe)(H<sub>2</sub>O)<sub>5</sub> at BP86-D3(BJ)/def2-TZVPP level.

This structure was depicted in Figure 5 of the *J. Phys. Chem. B* 2008, 112, 12783–12789.<sup>2</sup> This structure is about 17.8 kcal mol<sup>-1</sup> higher in energy than the lowest-energy structures of Na<sup>+</sup>(Phe)(H<sub>2</sub>O)<sub>5</sub> in our manuscript. We think this structure maybe one meta-stable structure.

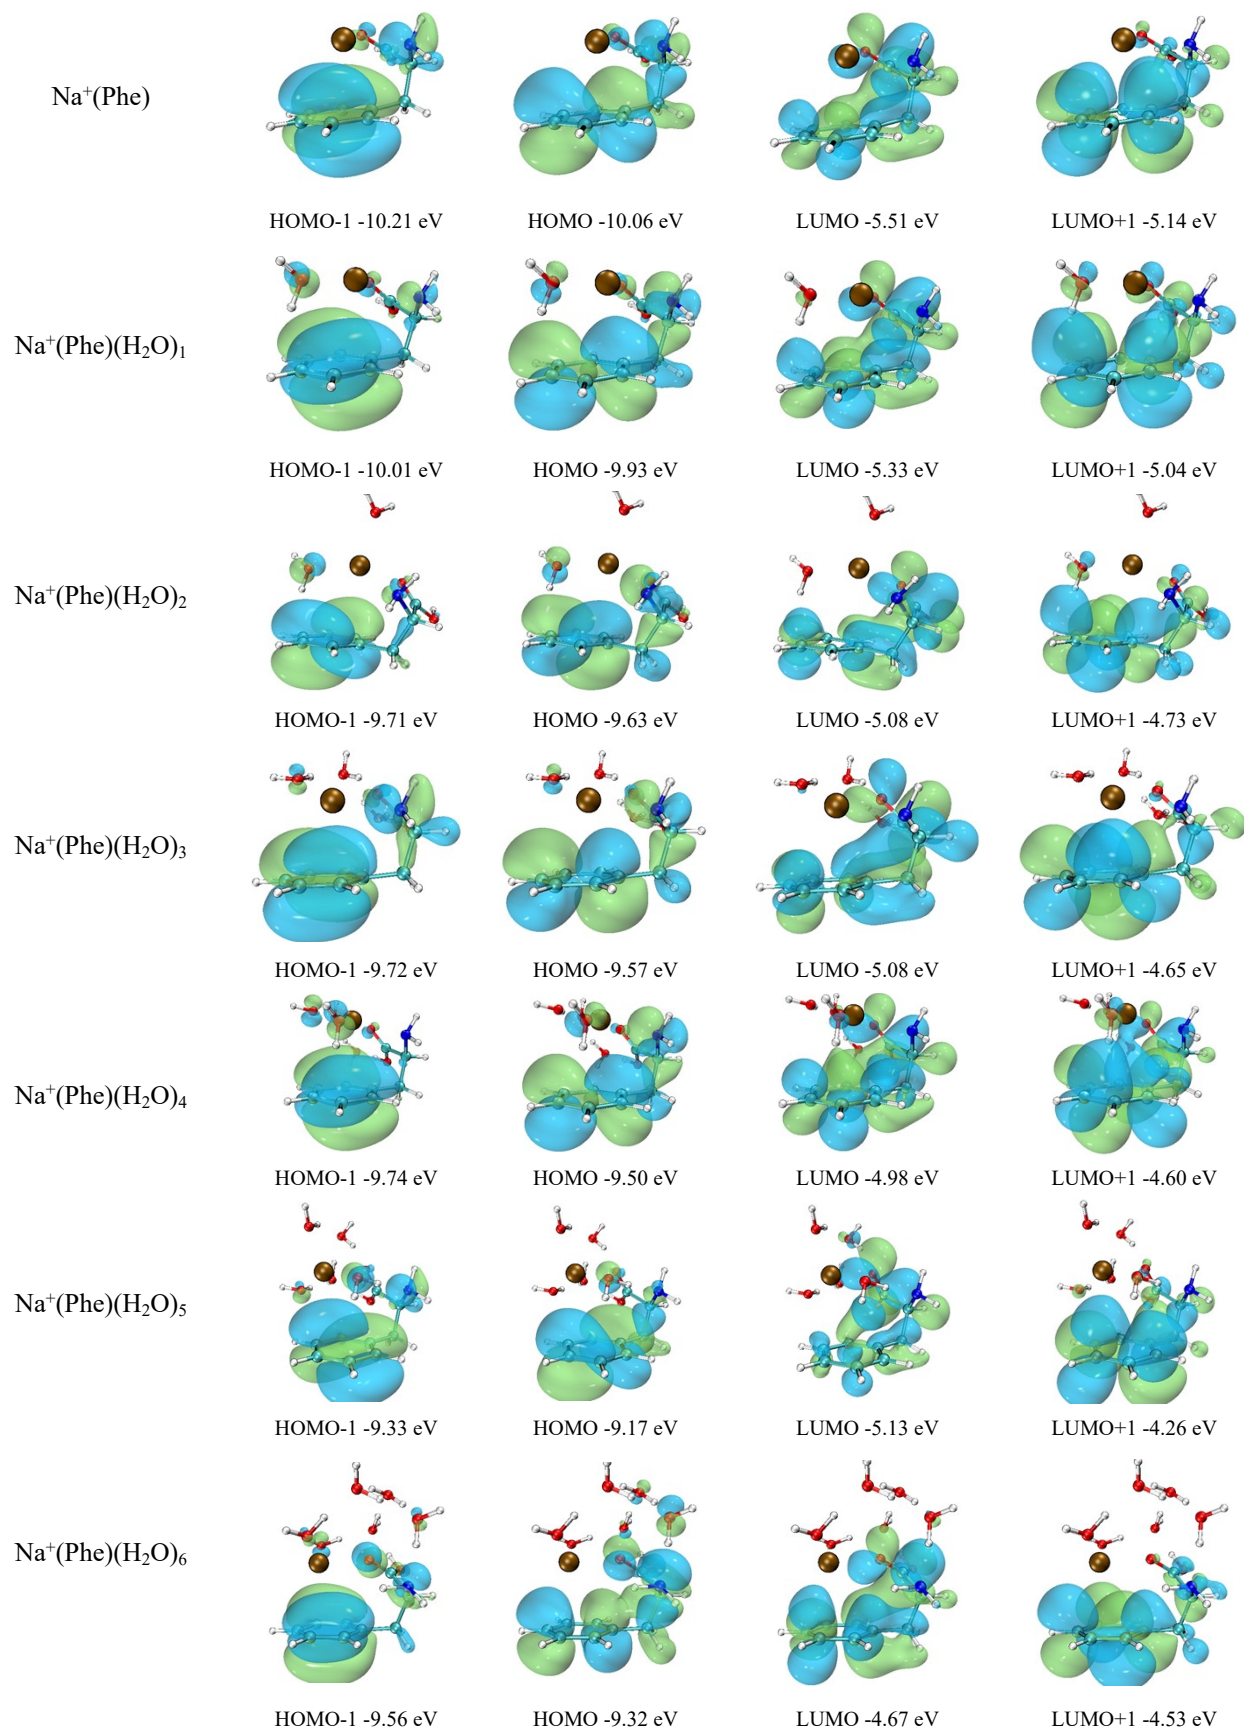

**Fig. S2** Selected molecular orbitals (isovalue = 0.02) of  $\text{Na}^+(\text{Phe})(\text{H}_2\text{O})_n$  ( $n=0-6$ ) with energy eigenvalues given in eV.



Na<sup>+</sup>(Phe)

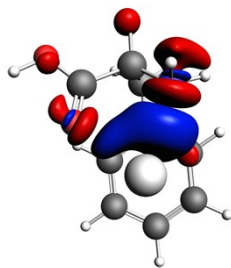

$$\Delta\rho_1: \Delta E_1 = -4.6 \text{ kcal}\cdot\text{mol}^{-1}$$
$$|v_1| = 0.16$$

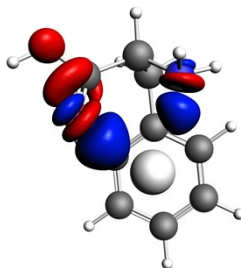

$$\Delta\rho_2: \Delta E_2 = -3.2 \text{ kcal}\cdot\text{mol}^{-1}$$
$$|v_2| = 0.11$$

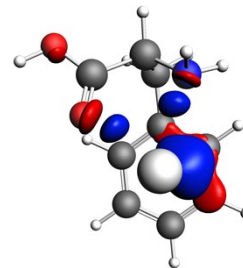

$$\Delta\rho_3: \Delta E_3 = -2.6 \text{ kcal}\cdot\text{mol}^{-1}$$
$$|v_3| = 0.10$$

Na<sup>+</sup>(Phe)(H<sub>2</sub>O)<sub>1</sub>

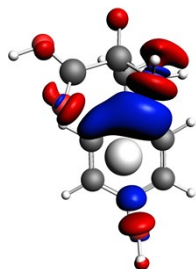

$$\Delta\rho_1: \Delta E_1 = -4.7 \text{ kcal}\cdot\text{mol}^{-1}$$
$$|v_1| = 0.15$$

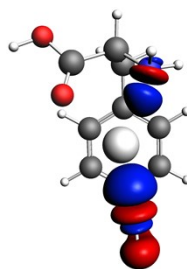

$$\Delta\rho_2: \Delta E_2 = -3.4 \text{ kcal}\cdot\text{mol}^{-1}$$
$$|v_2| = 0.11$$

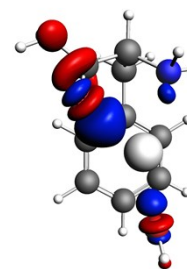

$$\Delta\rho_3: \Delta E_3 = -3.1 \text{ kcal}\cdot\text{mol}^{-1}$$
$$|v_3| = 0.11$$

Na<sup>+</sup>(Phe)(H<sub>2</sub>O)<sub>2</sub>

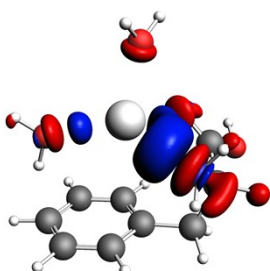

$$\Delta\rho_1: \Delta E_1 = -4.5 \text{ kcal}\cdot\text{mol}^{-1}$$
$$|v_1| = 0.15$$

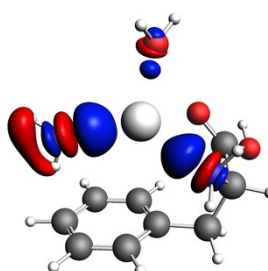

$$\Delta\rho_2: \Delta E_2 = -3.4 \text{ kcal}\cdot\text{mol}^{-1}$$
$$|v_2| = 0.11$$

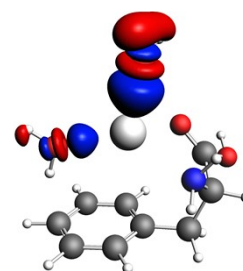

$$\Delta\rho_3: \Delta E_3 = -3.2 \text{ kcal}\cdot\text{mol}^{-1}$$
$$|v_3| = 0.11$$

Na<sup>+</sup>(Phe)(H<sub>2</sub>O)<sub>3</sub>

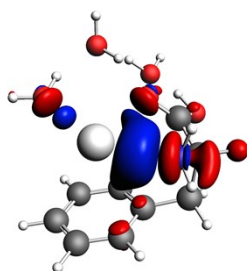

$$\Delta\rho_1: \Delta E_1 = -4.6 \text{ kcal}\cdot\text{mol}^{-1}$$
$$|v_1| = 0.16$$

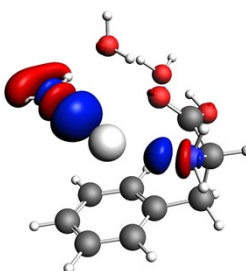

$$\Delta\rho_2: \Delta E_2 = -3.2 \text{ kcal}\cdot\text{mol}^{-1}$$
$$|v_2| = 0.11$$

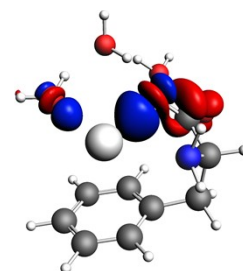

$$\Delta\rho_3: \Delta E_3 = -3.1 \text{ kcal}\cdot\text{mol}^{-1}$$
$$|v_3| = 0.11$$

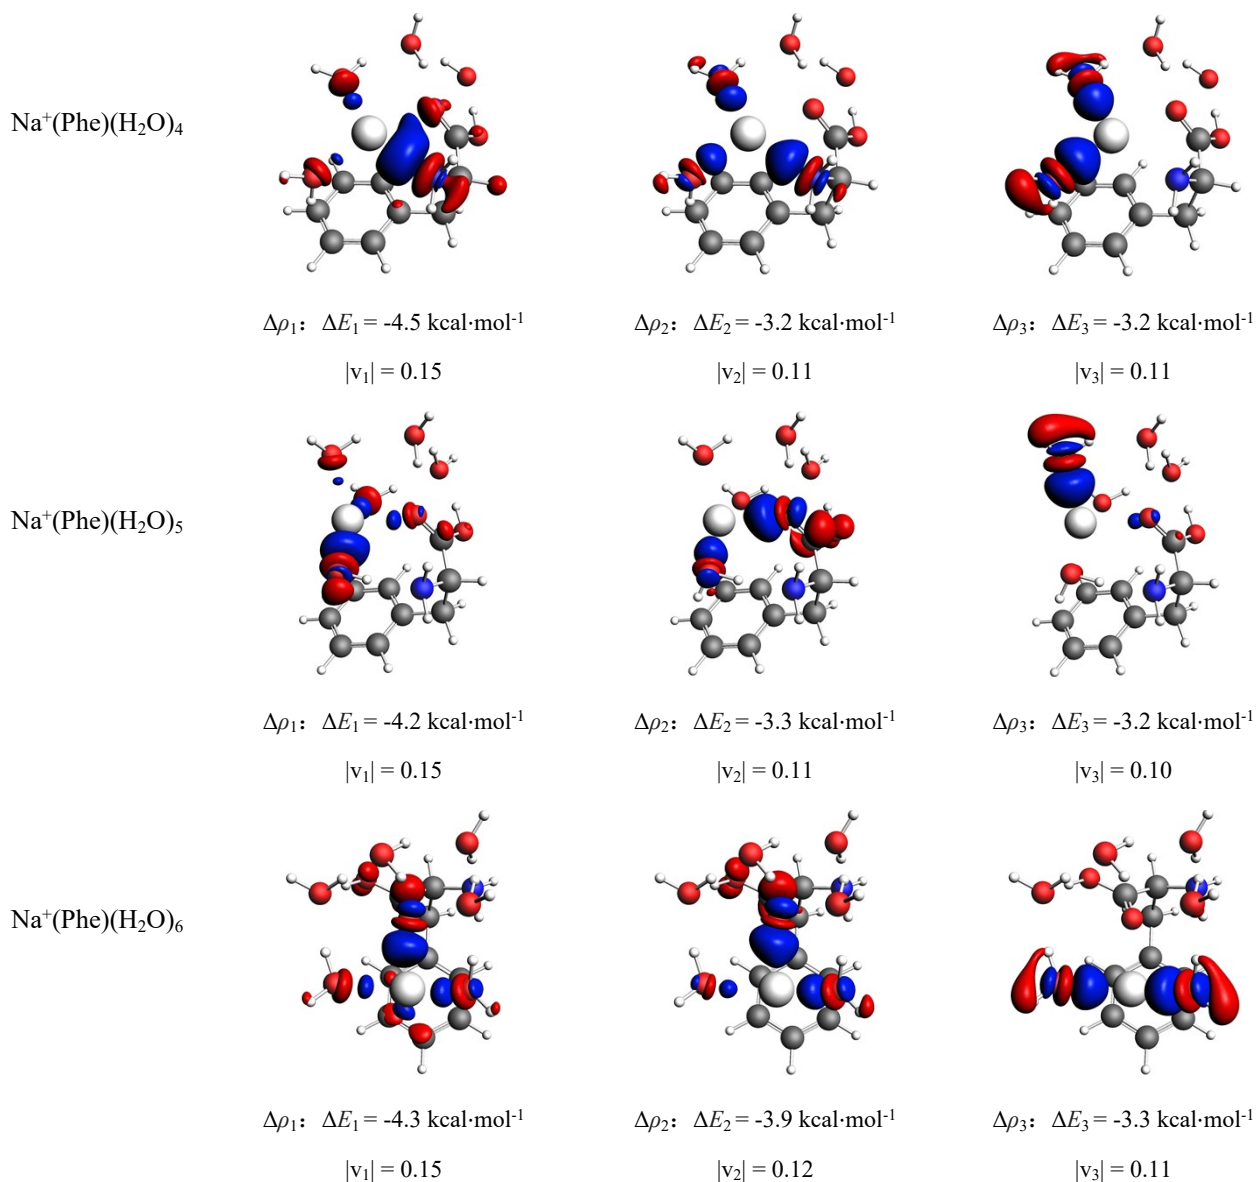

**Fig. S3** Deformation densities  $\Delta\rho_{1-3}$  (isovalue = 0.0008) of the orbital interaction in  $\text{Na}^+(\text{Phe})(\text{H}_2\text{O})_n$  between  $\text{Na}^+$  (singlet) and  $(\text{Phe})(\text{H}_2\text{O})_n$  (singlet) as interacting fragments with the association interaction energies  $\Delta E$  (in  $\text{kcal}\cdot\text{mol}^{-1}$ ) and their energy eigenvalues  $v$  (in e) which indicates the amount of donated and accepted charge. The direction of the charge flow is red  $\rightarrow$  blue.

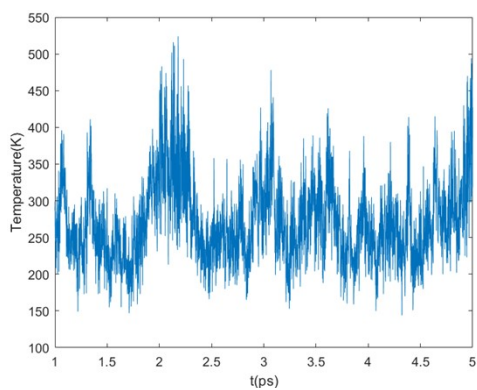

(a)

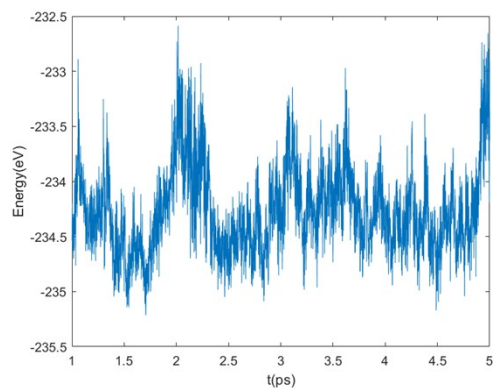

(b)

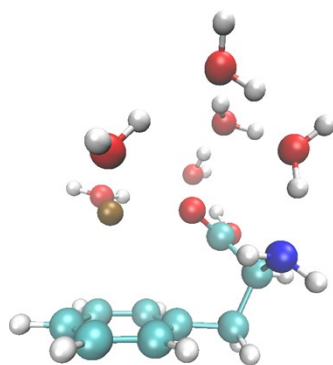

1.54 ps

$$D_{\text{cation}-\pi} = 2.93$$

$$\theta_{\text{cation}-\pi(\text{max})} = 12.52$$

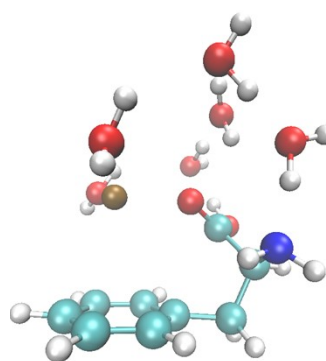

4.42 ps

$$D_{\text{cation}-\pi(\text{max})} = 3.11$$

$$\theta_{\text{cation}-\pi} = 9.79$$

(c)

**Fig. S4** The AIMD simulation at 300K of  $\text{Na}^+(\text{Phe})(\text{H}_2\text{O})_6$ ; (a) Temperature-time curve; (b) Energy-time curve; (c) Selected two other molecular dynamics trajectories.

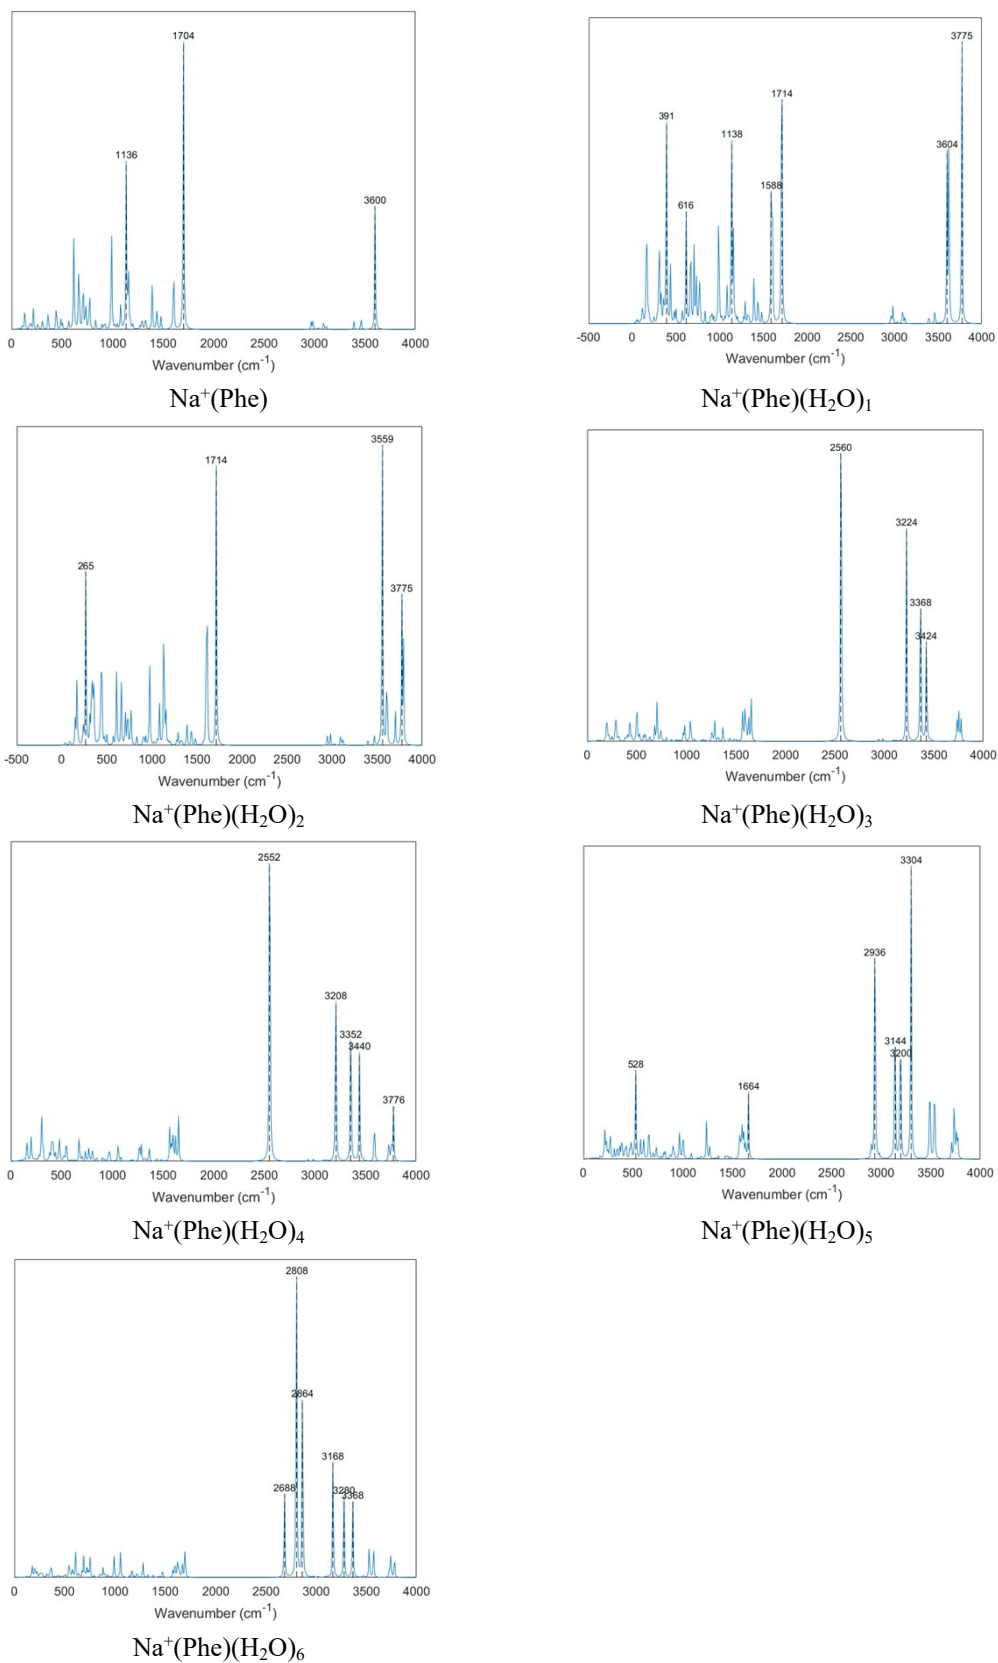

**Fig. S5** Simulated infrared spectra for  $\text{Na}^+(\text{Phe})(\text{H}_2\text{O})_n$  ( $n=0-6$ ).

Cartesian coordinates

(1) Na<sup>+</sup>(Phe)

BP86-D3(BJ)/def-TZVPP, Singlet

Energy = -717.230 a.u.

Gibbs free energy = -717.082 a.u.

|    |             |             |             |
|----|-------------|-------------|-------------|
| C  | 3.04931500  | -0.65386600 | 0.22019500  |
| C  | 2.83856300  | 0.71250700  | -0.00923200 |
| C  | 1.65942800  | 1.14502600  | -0.62898800 |
| C  | 0.66925000  | 0.22426600  | -1.02056400 |
| C  | 0.91174900  | -1.14663900 | -0.81882300 |
| C  | 2.08924400  | -1.58314800 | -0.20018200 |
| H  | 3.97073300  | -0.99422300 | 0.69320700  |
| H  | 3.59983000  | 1.43913300  | 0.27698800  |
| H  | 1.51143100  | 2.21006200  | -0.82017400 |
| H  | 0.17416700  | -1.88019800 | -1.14985200 |
| H  | 2.26314800  | -2.65024900 | -0.05873000 |
| C  | -0.66059100 | 0.70471900  | -1.54959500 |
| H  | -0.54794300 | 1.68569700  | -2.03446400 |
| H  | -1.06099000 | 0.01609900  | -2.30568200 |
| C  | -1.73656600 | 0.86749700  | -0.42949200 |
| H  | -2.64944100 | 1.25527400  | -0.90972000 |
| N  | -1.23503500 | 1.73857900  | 0.65419500  |
| H  | -0.85658800 | 2.59502600  | 0.24156900  |
| H  | -2.02058800 | 2.03817600  | 1.23902700  |
| C  | -2.07645500 | -0.49513700 | 0.16813700  |
| O  | -1.60146500 | -0.93415300 | 1.21022700  |
| O  | -2.93365400 | -1.17942000 | -0.59734800 |
| H  | -3.09214300 | -2.05395100 | -0.18293100 |
| Na | 0.28826900  | 0.22057500  | 1.92178300  |

(2) Na<sup>+</sup>(Phe)(H<sub>2</sub>O)

BP86-D3(BJ)/def-TZVPP, Singlet

Energy = -793.725 a.u.

Gibbs free energy = -793.560 a.u.

|    |             |             |             |
|----|-------------|-------------|-------------|
| Na | -0.23928200 | 1.80960100  | 0.25221500  |
| O  | -2.41156600 | 2.32504400  | -0.04954500 |
| H  | -2.99944900 | 3.08702600  | -0.16927100 |
| H  | -2.95287000 | 1.53274800  | -0.22627100 |
| C  | -2.88820000 | -0.81703800 | -0.61927000 |
| C  | -2.61137600 | -0.95620900 | 0.74630400  |
| C  | -1.29996100 | -1.19179000 | 1.17392800  |
| C  | -0.24714500 | -1.30131000 | 0.24956500  |
| C  | -0.53970500 | -1.15611000 | -1.11901100 |
| C  | -1.84624200 | -0.91158400 | -1.55118800 |
| H  | -3.91609600 | -0.68065700 | -0.96067800 |
| H  | -3.41849400 | -0.90707900 | 1.47797100  |
| H  | -1.09949700 | -1.33088900 | 2.23833900  |
| H  | 0.25665600  | -1.26648900 | -1.85728900 |
| H  | -2.05614800 | -0.82236900 | -2.61729600 |
| C  | 1.16507200  | -1.57270500 | 0.71645100  |
| H  | 1.14434000  | -2.05635300 | 1.70441800  |
| H  | 1.67074400  | -2.26866600 | 0.03326000  |
| C  | 2.05927600  | -0.30476900 | 0.85098400  |
| H  | 3.03970100  | -0.64281300 | 1.22500900  |
| N  | 1.41679600  | 0.69412200  | 1.72760300  |
| H  | 1.09520900  | 0.22883700  | 2.58007800  |
| H  | 2.11437200  | 1.37864800  | 2.03298700  |
| C  | 2.29231300  | 0.32145800  | -0.52107500 |
| O  | 1.68176400  | 1.28897300  | -0.95908700 |
| O  | 3.23122200  | -0.33497300 | -1.21573700 |

H 3.32050700 0.09157900 -2.09401800

(3) Na<sup>+</sup>(Phe)(H<sub>2</sub>O)<sub>2</sub>

BP86-D3(BJ)/def-TZVPP, Singlet

Energy = -870.215 a.u.

Gibbs free energy = -870.034 a.u.

|    |             |             |             |
|----|-------------|-------------|-------------|
| Na | 0.66480200  | 1.63917800  | 0.04877300  |
| O  | -1.33805300 | 2.66305000  | -0.22933200 |
| H  | -1.66624300 | 3.50354300  | -0.58328800 |
| H  | -2.09545200 | 2.04370900  | -0.26309400 |
| O  | 2.36956500  | 3.22957700  | 0.06854500  |
| H  | 2.43936800  | 4.10704900  | 0.47732000  |
| H  | 3.13569200  | 3.16855900  | -0.52471000 |
| C  | -3.26842600 | 0.15962400  | -0.58278400 |
| C  | -3.03850900 | 0.05486000  | 0.79476900  |
| C  | -1.93251600 | -0.65985100 | 1.26661700  |
| C  | -1.04785600 | -1.28927800 | 0.37770600  |
| C  | -1.28525600 | -1.16880800 | -1.00289200 |
| C  | -2.38157200 | -0.44897800 | -1.48125000 |
| H  | -4.15298800 | 0.67954100  | -0.95405700 |
| H  | -3.73308300 | 0.50837300  | 1.50270800  |
| H  | -1.78074600 | -0.76450000 | 2.34288500  |
| H  | -0.62800300 | -1.67565300 | -1.71185100 |
| H  | -2.56219900 | -0.38496900 | -2.55451200 |
| C  | 0.10786300  | -2.11433400 | 0.89559300  |
| H  | -0.08986600 | -2.41780200 | 1.93447100  |
| H  | 0.21018500  | -3.03882900 | 0.31100300  |
| C  | 1.48570700  | -1.39495500 | 0.88921800  |
| H  | 2.21566900  | -2.10648300 | 1.31153000  |
| N  | 1.41477700  | -0.12646000 | 1.63408600  |
| H  | 0.91913600  | -0.28257000 | 2.51463300  |
| H  | 2.35742900  | 0.17732800  | 1.89241700  |
| C  | 1.92817400  | -1.11209600 | -0.54345700 |
| O  | 1.89016500  | -0.01817000 | -1.09063000 |
| O  | 2.35424700  | -2.22772000 | -1.15793500 |
| H  | 2.60179100  | -1.99403600 | -2.07687700 |

(4) Na<sup>+</sup>(Phe)(H<sub>2</sub>O)<sub>3</sub>

BP86-D3(BJ)/def-TZVPP, Singlet

Energy = -946.709 a.u.

Gibbs free energy = -946.498 a.u.

|   |             |             |             |
|---|-------------|-------------|-------------|
| C | -2.57616000 | 1.83739100  | -1.00614600 |
| C | -3.29100900 | 0.91735500  | -0.22927200 |
| C | -2.82869800 | -0.39809600 | -0.09839200 |
| C | -1.64551800 | -0.81348700 | -0.73575900 |
| C | -0.95228900 | 0.11463700  | -1.53442300 |
| C | -1.41161000 | 1.42949700  | -1.66583600 |
| H | -2.93969800 | 2.85918900  | -1.11678900 |
| H | -4.21793300 | 1.21799400  | 0.26067300  |
| H | -3.40009800 | -1.11453600 | 0.49550400  |
| H | -0.05034700 | -0.19674500 | -2.06460500 |
| H | -0.86395600 | 2.13265300  | -2.29361100 |
| C | -1.08555100 | -2.19630400 | -0.50130800 |
| H | -1.89042500 | -2.89358300 | -0.22517800 |
| H | -0.61227800 | -2.58917900 | -1.41043800 |
| C | -0.02489300 | -2.22945300 | 0.63901400  |
| H | 0.33710000  | -3.26979200 | 0.71674800  |
| N | -0.60152200 | -1.71452900 | 1.89623500  |
| H | -1.46164000 | -2.22876300 | 2.10122500  |

|    |             |             |             |
|----|-------------|-------------|-------------|
| H  | 0.03600700  | -1.91388500 | 2.67182200  |
| C  | 1.17901800  | -1.37062000 | 0.26034900  |
| O  | 1.44328200  | -0.32462700 | 0.88129400  |
| O  | 1.85320100  | -1.82160900 | -0.76420600 |
| H  | 2.53957200  | -1.12043200 | -1.10845300 |
| Na | -0.55015900 | 0.81524200  | 1.55235200  |
| O  | 0.61777900  | 2.74410400  | 1.29338400  |
| H  | 1.52379500  | 2.62853000  | 0.91666100  |
| H  | 0.42831900  | 3.69344700  | 1.25836600  |
| O  | 3.34303600  | 0.01496000  | -1.75596100 |
| H  | 3.44966400  | 0.78338400  | -1.14097200 |
| H  | 4.20933500  | -0.16629700 | -2.15393100 |
| O  | 3.06238400  | 1.72486600  | 0.38377300  |
| H  | 3.81439800  | 1.88216600  | 0.97886400  |
| H  | 2.62339300  | 0.88281000  | 0.68895800  |

(5) Na<sup>+</sup>(Phe)(H<sub>2</sub>O)<sub>4</sub>

BP86-D3(BJ)/def-TZVPP, Singlet

Energy = -1023.199 a.u.

Gibbs free energy = -1022.971 a.u.

|    |             |             |             |
|----|-------------|-------------|-------------|
| Na | -0.37915200 | 1.19944700  | 1.24359500  |
| O  | 4.12074200  | -0.36153900 | -1.37868900 |
| H  | 3.96123800  | 0.59702200  | -1.18514000 |
| H  | 4.29131400  | -0.45029300 | -2.32962800 |
| O  | 0.70675800  | 2.95832100  | 0.23337100  |
| H  | 0.46511100  | 3.85389500  | -0.04524200 |
| H  | 1.64578200  | 2.82740100  | -0.03897700 |
| O  | -2.59920100 | 1.70219600  | 1.51814700  |
| H  | -3.16668000 | 2.39175500  | 1.89515400  |
| H  | -3.12529400 | 1.27985700  | 0.81088800  |
| O  | 3.28093800  | 1.93306800  | -0.16279200 |
| H  | 3.96673900  | 2.31332600  | 0.41149800  |
| H  | 2.83983700  | 1.20573400  | 0.36023100  |
| C  | -2.94144500 | 0.79928800  | -1.73012800 |
| C  | -3.54151400 | -0.16781600 | -0.91494300 |
| C  | -2.76891800 | -1.19869400 | -0.36550000 |
| C  | -1.39574600 | -1.29563100 | -0.63586400 |
| C  | -0.81034600 | -0.32922100 | -1.47497100 |
| C  | -1.57187400 | 0.71537600  | -2.00633000 |
| H  | -3.54064600 | 1.59820500  | -2.16758700 |
| H  | -4.61649300 | -0.13804900 | -0.72820500 |
| H  | -3.24720700 | -1.95466500 | 0.26054800  |
| H  | 0.24675000  | -0.40613100 | -1.73683000 |
| H  | -1.10041300 | 1.45204700  | -2.65699400 |
| C  | -0.57644700 | -2.41843400 | -0.04127000 |
| H  | -1.24983000 | -3.18106700 | 0.37624700  |
| H  | 0.02633800  | -2.91383600 | -0.81448900 |
| C  | 0.38406600  | -1.97249500 | 1.09330900  |
| H  | 0.83663900  | -2.89344200 | 1.50311700  |
| N  | -0.33624000 | -1.17843000 | 2.10226700  |
| H  | -1.22640300 | -1.63153800 | 2.31992500  |
| H  | 0.19535400  | -1.16065100 | 2.97605600  |
| C  | 1.54885800  | -1.15108200 | 0.54026500  |
| O  | 1.71544800  | 0.03845900  | 0.86324100  |
| O  | 2.31407100  | -1.82002000 | -0.28332600 |
| H  | 3.05237100  | -1.22609700 | -0.71300800 |

(6) Na<sup>+</sup>(Phe)(H<sub>2</sub>O)<sub>5</sub>

BP86-D3(BJ)/def-TZVPP, Singlet

Energy = -1099.690 a.u.

Gibbs free energy = -1099.437 a.u.

|   |             |             |            |
|---|-------------|-------------|------------|
| O | -2.70561500 | -2.27985200 | 1.47091100 |
|---|-------------|-------------|------------|

|    |             |             |             |
|----|-------------|-------------|-------------|
| H  | -3.39809500 | -1.61377200 | 1.27392100  |
| H  | -2.99233000 | -2.73761600 | 2.27569800  |
| O  | -3.13429500 | 0.62113700  | -1.87059300 |
| H  | -3.72507400 | 0.88997300  | -2.59335200 |
| H  | -3.68966000 | 0.47931500  | -1.05187200 |
| O  | 1.02765000  | -1.02964700 | 2.04417300  |
| H  | 1.92869500  | -1.32886000 | 1.83634600  |
| H  | 1.08592000  | -0.03063200 | 2.00021000  |
| O  | -3.90296500 | 0.17564700  | 0.64074200  |
| H  | -2.99690100 | 0.53591300  | 0.83884800  |
| H  | -4.53734600 | 0.69289700  | 1.16394600  |
| C  | 3.00650500  | -2.02309500 | -0.77221900 |
| C  | 3.74989200  | -1.12826900 | 0.00509300  |
| C  | 3.36300000  | 0.21284000  | 0.09111000  |
| C  | 2.23255200  | 0.68192200  | -0.59316300 |
| C  | 1.50978800  | -0.21935800 | -1.39096800 |
| C  | 1.88963800  | -1.56210400 | -1.47718900 |
| H  | 3.31289600  | -3.06664000 | -0.84980200 |
| H  | 4.64031600  | -1.47142500 | 0.53337200  |
| H  | 3.95455500  | 0.90671400  | 0.69191200  |
| H  | 0.65342600  | 0.13043800  | -1.97006100 |
| H  | 1.32215400  | -2.23992300 | -2.11581000 |
| C  | 1.79128300  | 2.11925100  | -0.45612100 |
| H  | 2.63287900  | 2.73882000  | -0.11294500 |
| H  | 1.46998400  | 2.52632200  | -1.42402900 |
| C  | 0.62851100  | 2.32401900  | 0.55297000  |
| H  | 0.41294000  | 3.41046000  | 0.56861200  |
| N  | 0.97884300  | 1.78981300  | 1.87477900  |
| H  | 1.83065100  | 2.24294800  | 2.21226300  |
| H  | 0.24247200  | 1.99578600  | 2.55359300  |
| C  | -0.66326100 | 1.67688600  | 0.07411400  |
| O  | -1.27838400 | 0.83301000  | 0.74335300  |
| O  | -1.07003300 | 2.12606300  | -1.09924200 |
| H  | -1.89717800 | 1.62261000  | -1.40276300 |
| O  | -1.53571000 | -1.68853400 | -1.55298000 |
| H  | -1.92138400 | -2.50503900 | -1.90724300 |
| H  | -2.13429300 | -0.96868700 | -1.85345000 |
| Na | -0.66356100 | -1.57213100 | 0.63604200  |

(7) Na<sup>+</sup>(Phe)(H<sub>2</sub>O)<sub>6</sub>

BP86/def-QZVPPD, Singlet

Energy = -1176.180 a.u.

Gibbs free energy = -1175.906 a.u.

|   |             |             |             |
|---|-------------|-------------|-------------|
| O | -2.79518000 | 1.78458600  | 1.18887600  |
| H | -3.35540200 | 2.52655000  | 1.46742000  |
| H | -1.83613100 | 2.13243000  | 1.16151700  |
| O | -3.70861600 | -0.39191200 | -0.50880600 |
| H | -3.54571900 | -0.89836000 | 0.31548100  |
| H | -3.47163800 | 0.51864900  | -0.22559000 |
| O | -2.17550700 | -1.10591700 | -2.48560800 |
| H | -2.81597700 | -0.87423300 | -1.71782600 |
| H | -2.72368100 | -1.27652300 | -3.26934500 |
| O | -0.37709900 | -2.87949700 | -1.33935000 |
| H | -1.04398400 | -2.34862600 | -1.84345500 |
| H | -0.42446300 | -3.77969900 | -1.69277000 |
| C | 3.52044100  | -1.37754800 | 0.54066100  |
| C | 3.33215200  | -0.33034400 | 1.45113200  |
| C | 2.77933600  | 0.88121500  | 1.02287200  |
| C | 2.38641900  | 1.06282900  | -0.31397200 |
| C | 2.58286400  | 0.00530700  | -1.21883000 |
| C | 3.15255000  | -1.20223200 | -0.80100200 |

|    |             |             |             |
|----|-------------|-------------|-------------|
| H  | 3.98106900  | -2.31116600 | 0.86633800  |
| H  | 3.63839600  | -0.44887500 | 2.49084000  |
| H  | 2.68027600  | 1.70428700  | 1.73348900  |
| H  | 2.29701100  | 0.13409700  | -2.26447500 |
| H  | 3.32015500  | -2.00100800 | -1.52454600 |
| C  | 1.71228600  | 2.33333000  | -0.76873400 |
| H  | 2.16444400  | 3.21201000  | -0.28457600 |
| H  | 1.83696100  | 2.45902400  | -1.85329700 |
| C  | 0.18142900  | 2.36599800  | -0.45343600 |
| H  | -0.25916700 | 3.22419100  | -0.97781400 |
| N  | -0.16136900 | 2.46828500  | 0.97628700  |
| H  | 0.27817400  | 1.69561000  | 1.48687600  |
| H  | 0.20344300  | 3.34112100  | 1.36399600  |
| C  | -0.45783300 | 1.08722100  | -0.97187500 |
| O  | -0.59742800 | 0.10641300  | -0.24047200 |
| O  | -0.80279900 | 1.12151900  | -2.24579100 |
| H  | -1.27257600 | 0.23941200  | -2.47054700 |
| O  | -0.41137700 | -1.70121200 | 2.55552500  |
| H  | -1.34354300 | -1.35169200 | 2.56351100  |
| H  | -0.27727600 | -2.14132700 | 3.40708700  |
| O  | -2.91399600 | -0.69069700 | 2.25067100  |
| H  | -2.87791500 | 0.28524500  | 2.03307400  |
| H  | -3.59714000 | -0.79546500 | 2.93224500  |
| Na | 0.42658300  | -1.76587000 | 0.46791800  |

## References

1. H. Wincel, "Hydration Energies of Sodiated Amino Acids from Gas-Phase Equilibria Determinations," *J. Phys. Chem. A*, 2007, **111**, 5784-5791.
2. F. Costanzo, R.G. Della Valle, "Car-Parrinello MD Simulations for the Na<sup>+</sup>-Phenylalanine Complex in Aqueous Solution," *J. Phys. Chem. B*, 2008, **112**, 12783–12789
